# Supplementary material for: Genome-wide analysis of circular RNAs in prenatal and postnatal muscle of sheep
Source: PubMed Central journal article supplement (PMC5722553; doi:10.18632/oncotarget.21835), 2017-10-12
Supplement: oncotarget-08-97165-s001.pdf [file oncotarget-08-97165-s001.pdf]

## Genome-wide analysis of circular RNAs in prenatal and postnatal muscle of sheep

### SUPPLEMENTARY MATERIALS

**Supplementary Table 1: Details of primers and amplicons of the 10 circRNAs used for RT-PCR and  $\beta$ -Actin for Real-Time PCR**

| Gene name      | Primer sequence (forward/reverse) | Annealing Temperature (°C) | Primer length (bp) | Amplicon size (bp) |
|----------------|-----------------------------------|----------------------------|--------------------|--------------------|
| circ-0002456   | AAACCTAAGCATTGCCAGTA              | 51.30                      | 20                 | 147                |
|                | CCTTTCAGGATATTTTCTTCATA           | 50.64                      | 23                 |                    |
| circ-0005179   | TCAGATGTGTTCCACCTTTT              | 51.30                      | 20                 | 169                |
|                | GTTGTTGATGGTTTGGAGTG              | 53.35                      | 20                 |                    |
| circ-0000666   | TGTGGGTACAGCATGTCTCTT             | 55.61                      | 21                 | 177                |
|                | AAACGTAATCTGATTTCCGGTCT           | 52.08                      | 22                 |                    |
| circ-0000552   | CATTCCCGAAGTGCCATAAC              | 55.40                      | 20                 | 176                |
|                | TCCACTGGGTTCACTGATAAGAG           | 57.77                      | 23                 |                    |
| circ-0005250   | GCAGCGTGTGAAGCAGAAG               | 57.32                      | 19                 | 149                |
|                | GGTGCTCATTTCATCTGGTCCT            | 57.57                      | 21                 |                    |
| circ-0005256   | CCAACACCAACCTGTCCAAG              | 57.45                      | 20                 | 148                |
|                | ATGCGGCAGACCAAGAAGA               | 55.16                      | 19                 |                    |
| circ-0003541   | GTGGACGCCATTCCCCTGC               | 61.64                      | 19                 | 106                |
|                | GAGCCCAATCATCTTCCCTTT             | 57.67                      | 22                 |                    |
| circ-0005243   | GGTGAAGGTGGGCAACGAGTA             | 59.52                      | 21                 | 153                |
|                | TGGCGAGGCTGCTTGGTC                | 59.46                      | 18                 |                    |
| circ-0004690   | GCTTACCCACCAGAGTATTATCAA          | 56.15                      | 24                 | 155                |
|                | GACAATCTATGCCTGCTACGAG            | 57.67                      | 22                 |                    |
| circ-0004676   | AGTCCAATTTTCACGACCACA             | 59.50                      | 20                 | 136                |
|                | CAGCTACTCCTTGCCACAGG              | 53.66                      | 21                 |                    |
| $\beta$ -Actin | CCAACCGTGAGAAGATGACC              | 57.45                      | 20                 | 97                 |
|                | CCAGAGGCGTACAGGGACAG              | 61.55                      | 20                 |                    |

**Supplementary File 1: Detailed comments for all circRNAs.** See [Supplementary\\_File\\_1](#)

**Supplementary File 2: KEGG pathway analysis demonstrated 270 terms were enriched.**  
[Supplementary\\_File\\_2](#)

**Supplementary File 3: Interaction relationships between circRNAs and various miRNAs were found.** See [Supplementary\\_File\\_3](#)

**Supplementary File 4: The circRNA-miRNA-mRNA interaction network between circRNA and its target gene.** See [Supplementary\\_File\\_4](#)
